# Supplementary material
Source: ML conference proceedings conference paper supplement (https://proceedings.neurips.cc/paper_files/paper/2024/hash/06477eb61ea6b85c6608d42a222462df-Abstract.html)
Supplement: Supplementary file 1 [file 06477eb61ea6b85c6608d42a222462df-Supplemental-Datasets_and_Benchmarks_Track.pdf]

---

# SolarCube: Supplementary Information

---

Ruohan Li<sup>1</sup>, Yiqun Xie<sup>1</sup>, Xiaowei Jia<sup>2</sup>, Dongdong Wang<sup>1</sup>, Yanhua Li<sup>3</sup>,  
Yingxue Zhang<sup>4</sup>, Zhihao Wang<sup>1</sup>, Zhili Li<sup>1</sup>

<sup>1</sup>University of Maryland, <sup>2</sup>University of Pittsburgh, <sup>3</sup>Worcester Polytechnic Institute

<sup>4</sup>SUNY - Binghamton

{r526li, xie, ddwang, zhwang1, lizhili}@umd.edu,  
xiaowei@pitt.edu, yli15@wpi.edu, yzhang42@binghamton.edu

## 1 A Data: Access and Datasheet

### 2 A.1 Dataset Access

3 The SolarCube datasets are available for downloading from Zenodo (<https://doi.org/10.5281/zenodo.11498739>). The Croissant metadata can be downloaded from Google Drive  
4 ([https://drive.google.com/drive/folders/1lt0JlLxJk8BxD51LpKD4aSM-TMlAWcza?](https://drive.google.com/drive/folders/1lt0JlLxJk8BxD51LpKD4aSM-TMlAWcza?usp=drive_link)  
5 ([https://drive.google.com/drive/folders/1lt0JlLxJk8BxD51LpKD4aSM-TMlAWcza?](https://drive.google.com/drive/folders/1lt0JlLxJk8BxD51LpKD4aSM-TMlAWcza?usp=drive_link)  
6 [usp=drive\\_link](https://drive.google.com/drive/folders/1lt0JlLxJk8BxD51LpKD4aSM-TMlAWcza?usp=drive_link)).

### 7 A.2 Datasheet

#### 8 A.2.1 Motivations

9 Solar power has been the fastest-growing power globally, with solar PV installed capacity increasing  
10 from 304.3 GW in 2016 to 760.4 GW in 2020 [1]. Studies also suggest that PV will become the  
11 dominant electricity supply technology in the cost-optimal climate mitigation scenarios by 2050  
12 [2]. While many studies have explored data-driven methods for solar forecasting, there is a lack  
13 of ML-ready datasets for model validation, benchmarking new capabilities, and facilitating the  
14 development of better models for various solar forecasting tasks across diverse regions. SolarCube  
15 is designed as a multi-purpose dataset to address this gap in the renewable energy sector. With the  
16 provided Python package, the datasets can be used for different tasks in solar forecasting, considering  
17 forecasting horizons and spatial scale.

18 A team of researchers with expertise in remote sensing, surface energy budget, and machine learning  
19 developed the ML-ready SolarCube. This material is based upon work supported by the National  
20 Science Foundation under Grant No. 2105133, 2126474 and 2147195; USGS under Grant No.  
21 G21AC10207; Google's AI for Social Good Impact Scholars program; the DRI award and the Zaratan  
22 supercomputing cluster at the University of Maryland; and Pitt Momentum Funds award and CRC at  
23 the University of Pittsburgh.

#### 24 A.2.2 Composition

25 SolarCube encompasses 19 study areas across multiple continents including North America, South  
26 America, Asia, and Oceania with 9 variables. These include 6 image-based variables and 3 point-based  
27 variables. Table 1 lists the variables, their sources, and the spatial-temporal resolution in SolarCube.  
28 The image-based variables are organized in a spatio-temporal grid format with three dimensions:  
29 latitude, longitude, and time. For each study area, the image-based variables are structured into 600  
30 km by 600 km image patches at a 5 km spatial resolution and feature a year-long image sequence  
31 in 2018 with a temporal resolution of 15 minutes, with 35040 time steps in total. A total data  
32 points of around 239,673,600,000 are covered for each image-based variable. A visualization of the

33 image-based variables is shown in Figure 1. The point-based variables are located over 19 ground  
 34 measurement sites within the 19 study areas. The measured solar radiation is provided with 1 min  
 35 temporal resolution in 2018, which contributes to around 9986400 data instances. The rest of the  
 36 point-based variables are static for model evaluation scenarios.

37 The three satellite bands variables (vis047, vis086, and ir133), solar zenith angle (SZA), satellite-  
 38 derived solar radiation (SSR), and ground-measured solar radiation are used for model training. The  
 39 rest of the variables are mainly used for model evaluation. Users can define their features and target  
 40 variables based on their specific tasks. In this study, for area-based forecasting tasks, the label is  
 41 SSR. For point-based forecasting tasks, the label is ground-measured solar radiation. For short-term  
 42 forecasting, each sample contains continuous data within 24 time frames, sampled with a stride of 8  
 43 time steps. For long-term forecasting, each sample contains continuous data within 192 time frames,  
 44 sampled with a stride of 72 time steps. All these sampling choices can be customized using the  
 45 provided Python package available at <https://github.com/Ruohan-Li/SolarCube>.

46 The 19 study areas are a subset of the total areas covered by the GOES-16 and Himawari-8. The  
 47 selection of the study areas is mostly restricted by the availability of ground monitoring sites that  
 48 provide minute-wise solar radiation measurement. We include all available sites that fulfill the  
 49 requirements. We provide information about the sites and their corresponding study areas in Table  
 50 2. The location of the study area and the diversity of landscapes are summarized in the main text.  
 51 To make the data size of SolarCube manageable while still meeting the needs of various forecasting  
 52 horizon tasks, we have selected study areas with a spatial scale of 600 km by 600 km. Except for  
 53 ir133, the other dynamic variables are only available during the daytime due to the nature of the  
 54 sun. This study only focuses on solar radiation forecasting over terrestrial, hence the ocean part of  
 55 the imaged-based variables are excluded. The ground measurement instrument may occasionally  
 56 malfunction or produce suspicious measurements that do not pass the quality check due to various  
 57 reasons (e.g., dust cover). Such data are excluded. The availability of all variables is summarized in  
 58 separate files provided along with the data.

59 We use the data of 14 study areas as training and test the rest of 5 study areas. The choice of the testing  
 60 study areas is also listed in Table 2. We split the dataset in this way to test ML performance in large-  
 61 scale applications. Testing on independent study areas can better indicate the models’ generalizability  
 62 over other regions considering spatial variability [3].

Table 1: Table of all variables in SolarCube

| Variable                                                        | Source                  | S. Res. | T. Res. | Ref.    |
|-----------------------------------------------------------------|-------------------------|---------|---------|---------|
| <b>Area-based variables</b>                                     |                         |         |         |         |
| 0.47 $\mu$ m visible channel of GOES-16 and Himawari-8 (vis047) | GeoNEX                  | 5km     | 15min   | [4]     |
| 0.86 $\mu$ m visible channel of GOES-16 and Himawari-8 (vis086) | GeoNEX                  | 5km     | 15min   | [4]     |
| 13.3 $\mu$ m infrared channel of GOES-16 and Himawari-8 (ir133) | GeoNEX                  | 5km     | 15min   | [4]     |
| Solar Zenith Angle (sza)                                        | GeoNEX                  | 5km     | 15min   | [4]     |
| Satellite derived Solar Radiation (ssr)                         | -                       | 5km     | 15min   |         |
| Cloud Mask (cm)                                                 | NOAA & EUMETSAT NWC SAF | 5km     | 15min   | [5] [6] |
| <b>Point-based variables</b>                                    |                         |         |         |         |
| Ground-measured solar radiation                                 | SURFRAD, BSRN           | point   | 1min    | [7] [8] |
| Land surface types                                              | MODIS                   | point   | static  | [9]     |
| Elevation                                                       | GTOPO30                 | point   | static  | [10]    |

### 63 A.2.3 Collection Process

64 Except for the satellite-derived solar radiation variables, all other variables are obtained from public  
 65 datasets available on their respective official websites. These official datasets come with user guides  
 66 that document the data quality and validation results, as listed in Table 1. These variables were  
 67 collected by the authors through direct downloads from the websites. No crowdworkers were involved  
 68 in the data collection process, and no ethical review was conducted.

69 **Satellite Derived Solar Radiation Data Validation** SSR is the only variable not directly ob-  
 70 tained from existing datasets. However, the methodology for deriving this data is well-established  
 71 and has been successfully used to generate numerous public official datasets, including NASA

Table 2: Table of the study area and ground measurement site.  $lat\_ulcnnr$ ,  $lon\_ulcnnr$ ,  $lat\_lrcnnr$ , and  $lon\_lrcnnr$  represent the upper left corner latitude, upper left corner longitude, lower right corner latitude, and lower right corner longitude, respectively.

| Id | Name | Latitude | Longitude | Network | Elevation | Timezone            | lat_ulcnnr | lon_ulcnnr | lat_lrcnnr | lon_lrcnnr | Test |
|----|------|----------|-----------|---------|-----------|---------------------|------------|------------|------------|------------|------|
| 1  | bon  | 40.050   | -88.370   | SURFRAD | 213.0000  | America/Chicago     | 43.05      | -91.37     | 37.05      | -85.37     | no   |
| 2  | fpk  | 48.310   | -105.100  | SURFRAD | 623.3125  | America/Denver      | 51.31      | -108.10    | 45.31      | -102.10    | no   |
| 3  | gwn  | 34.250   | -89.870   | SURFRAD | 101.0625  | America/Chicago     | 37.25      | -92.87     | 31.25      | -86.87     | no   |
| 4  | dra  | 36.620   | -116.020  | SURFRAD | 998.0625  | America/Los_Angeles | 39.62      | -119.02    | 33.62      | -113.02    | no   |
| 5  | psu  | 40.720   | -77.930   | SURFRAD | 375.5625  | America/New_York    | 43.72      | -80.93     | 37.72      | -74.93     | yes  |
| 6  | sxf  | 43.730   | -96.620   | SURFRAD | 476.3125  | America/Chicago     | 46.73      | -99.62     | 40.73      | -93.62     | no   |
| 7  | tbl  | 40.120   | -105.240  | SURFRAD | 1651.5625 | America/Denver      | 43.12      | -108.24    | 37.12      | -102.24    | yes  |
| 8  | FLO  | -27.533  | -48.517   | BSRN    | 55.0000   | America/Sao_Paulo   | -24.00     | -54.00     | -30.00     | -48.00     | no   |
| 9  | LRC  | 37.104   | -76.387   | BSRN    | 4.2500    | America/New_York    | 42.00      | -78.00     | 36.00      | -72.00     | yes  |
| 10 | ASP  | -23.798  | 133.888   | BSRN    | 548.0625  | Australia/Darwin    | -18.00     | 132.00     | -24.00     | 138.00     | no   |
| 11 | COC  | -12.193  | 96.835    | BSRN    | 3.0625    | Indian/Cocos        | -12.00     | 96.00      | -18.00     | 102.00     | yes  |
| 12 | DWN  | -12.424  | 130.893   | BSRN    | 25.9375   | Australia/Darwin    | -12.00     | 126.00     | -18.00     | 132.00     | no   |
| 13 | FUA  | 33.582   | 130.375   | BSRN    | 8.0625    | Asia/Tokyo          | 36.00      | 126.00     | 30.00      | 132.00     | no   |
| 14 | HOW  | 22.554   | 88.306    | BSRN    | 6.5000    | Asia/Kolkata        | 24.00      | 84.00      | 18.00      | 90.00      | no   |
| 15 | ISH  | 24.337   | 124.163   | BSRN    | 11.5000   | Asia/Tokyo          | 30.00      | 120.00     | 24.00      | 126.00     | no   |
| 16 | LAU  | -45.045  | 169.689   | BSRN    | 352.5000  | Pacific/Auckland    | -42.00     | 168.00     | -48.00     | 174.00     | no   |
| 17 | NEW  | -32.884  | 151.729   | BSRN    | 19.6875   | Australia/Sydney    | -30.00     | 150.00     | -36.00     | 156.00     | no   |
| 18 | SAP  | 43.060   | 141.328   | BSRN    | 20.5625   | Asia/Tokyo          | 48.00      | 138.00     | 42.00      | 144.00     | yes  |
| 19 | TAT  | 36.058   | 140.126   | BSRN    | 28.1250   | Asia/Tokyo          | 42.00      | 138.00     | 36.00      | 144.00     | no   |

72 MODIS/Terra+Aqua Surface Radiation product (MCD18) [11] and the GeoNEX DSR/PAR Surface  
73 Radiation product [12]. We used the same data sources and methodologies as the GeoNEX DSR/PAR  
74 dataset [12]. The input variables are listed in Table 3. The method is elaborated in Section 3 of the  
75 main manuscript.

76 To confirm the quality of the SSR in SolarCube, we conduct a comprehensive comparison with  
77 existing datasets. We validate the SSR by comparing them with the ground measurements over the 19  
78 sites. The evaluation metrics are similar to the forecasting tasks, which are  $R^2$ , RMSE, MBD, and  
79 their relative values for fair comparison. The validation results of SolarCube raw temporal resolution  
80 (15min) are listed in Table 4. There are no other image-scale solar radiation products with the same  
81 temporal resolution covering the study areas for comparison. The highest temporal resolution of  
82 the current image-scale solar radiation datasets with the same coverage as the proposed studies is 1  
83 hour. Therefore, we aggregate the SSR of SolarCube to 1 hour to facilitate better comparison with  
84 these datasets. The hourly SSR of SolarCube is obtained by calculating the mean of the available  
85 15-minute resolution data for that hour. The hourly ground-measured solar radiation is averaged from  
86 all available 1-minute resolution data within that hour. The datasets compared in this study include  
87 both satellite-derived and reanalysis data. Their corresponding spatial and temporal resolutions and  
88 the comparison of the dataset validation results are shown in Table 4. SolarCube presents a similar  
89 accuracy to the GeoNEX dataset at an hourly scale [12], further demonstrating the robustness of  
90 the methods. SolarCube demonstrates significantly better performance compared to other datasets,  
91 including the benchmark satellite-derived datasets CERES, the newly developed satellite-derived  
92 datasets EPIC, and reanalysis data ERA5. Additionally, we plot a scatter plot to compare SolarCube  
93 with ERA5, which is widely used in earth system forecasting, as elaborated in Section 2 of the main  
94 text. The results are shown in Figure 2, where the color of the scatterplot represents the sample  
95 density.

Table 3: Data sources and their spatial and temporal resolution in generating satellite-derived solar radiation data

| Input Variable                                                  | Source             | S. Res.                     | T. Res.  |
|-----------------------------------------------------------------|--------------------|-----------------------------|----------|
| 0.47 $\mu$ m visible channel of GOES-16 and Himawari-8          | GeoNEX             | 1km                         | 10/15min |
| solar zenith angle, sensor zenith angle, relative azimuth angle | GeoNEX             | 1km                         | 10/15min |
| Surface albedo                                                  | MODIS, Climatology | 1km                         | Daily    |
| Total precipitable water vapor                                  | MERRA2             | 0.5 $\times$ 0.625 $^\circ$ | Hourly   |
| Surface elevation                                               | GTOPO30            | 30 arcsec                   | Static   |

## 96 A.2.4 Preprocessing, cleaning, labeling

97 The satellite data (including three-band and SZA variables) from GOES-16 are downloaded at 15-  
98 minute intervals, while data from Himawari-8 are downloaded at 10-minute intervals. Both datasets

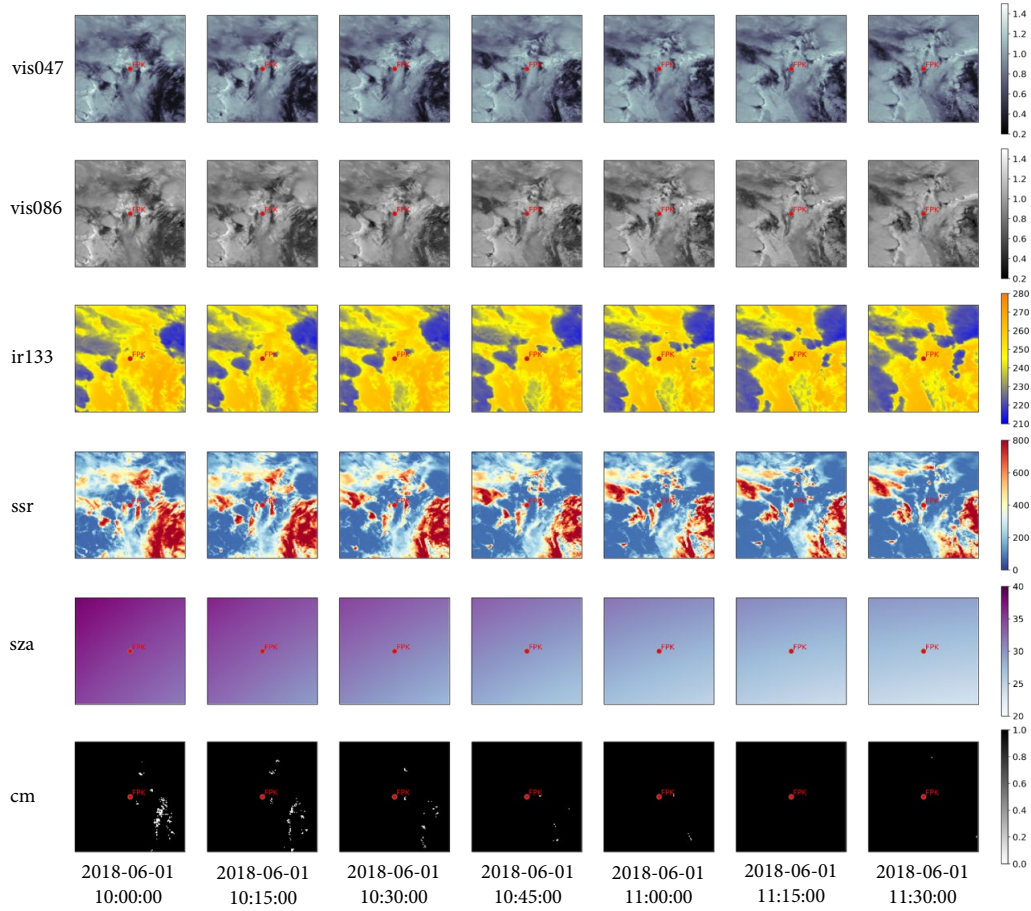

Figure 1: Visualization of all image-based variables for a time sequence

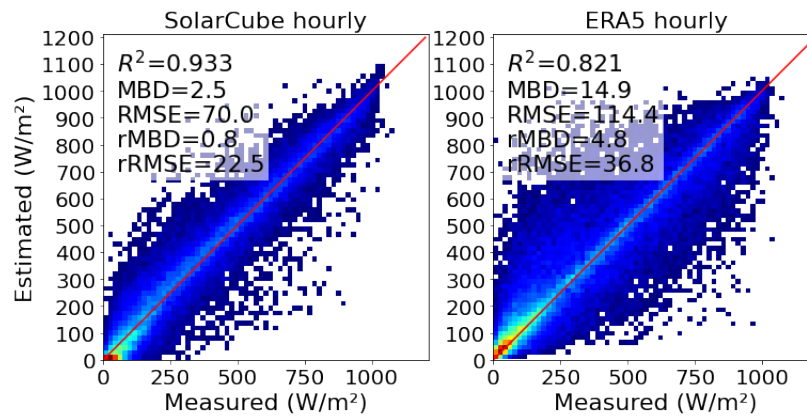

Figure 2: Comparison of SolarCube SSR and ERA5 at hourly scale

Table 4: Validation results of satellite-derived solar radiation variables in SolarCube and other image-scale solar radiation datasets

| Datasets  | Type              | Temp. Res. | Sp. Res.     | Metrics |      |       |      |       |
|-----------|-------------------|------------|--------------|---------|------|-------|------|-------|
|           |                   |            |              | $R^2$   | MBD  | RMSE  | rMBD | rRMSE |
| SolarCube | Satellite-derived | 15min      | 5km          | 0.904   | 3.4  | 94.3  | 1.0  | 26.7  |
| SolarCube | Satellite-derived | hourly     | 5km          | 0.933   | 2.5  | 70.0  | 0.8  | 22.5  |
| ERA5      | Reanalysis        | hourly     | 0.5° ( 50km) | 0.821   | 14.9 | 114.4 | 4.8  | 36.8  |
| CERES     | Satellite-derived | hourly     | 1° ( 100km)  | 0.903   | 3.2  | 82.6  | 1.0  | 26.6  |
| EPIC      | Satellite-derived | hourly     | 0.1° ( 10km) | 0.804   | 13.4 | 119.2 | 4.3  | 38.3  |

99 have a raw spatial resolution of 1 km. To ensure temporal consistency, we averaged two observations  
100 from Himawari-8 around each 15-minute mark (e.g., using 00:10 and 00:20 to calculate 00:15).  
101 We used the time-aligned satellite data to produce the SSR variables, ensuring the same temporal  
102 and spatial resolution, and aligned them well in a datacube. The cloud mask datasets for GOES-16  
103 and Himawari-8 are structured in a Cartesian coordinate system. We extracted the center latitude  
104 and longitude of each pixel in the datacube and applied a projection transformation to find the  
105 corresponding pixel in the cloud mask products. The values of the cloud mask were then assigned to  
106 the datacube as well. We then aggregated the datacube from a 1 km resolution to a 5 km resolution to  
107 create a more portable dataset. The rationale for choosing a 5 km resolution is elaborated in the main  
108 text. All the image-based variables are structured in the datacube with dimensions of 35040x600x600,  
109 representing time, height, and width. For point-based variables, the preprocessing and cleaning of  
110 the ground measurements are described in the main text. The land cover types and elevations are  
111 extracted from their raw dataset based on the latitude and longitude of the sites. All variables are  
112 preprocessed using Python packages such as netCDF4 and h5py.

### 113 A.2.5 Uses

114 The SolarCube has been used for three subtasks presented in the main text, including area-based short-  
115 term forecasting, point-based short-term forecasting, point-based long-term forecasting. Additional  
116 tasks that can be used are listed in Section 5 in the main text. The current dataset composition  
117 sufficiently supports a wide range of solar radiation forecasting tasks. However, for ultra-long term  
118 forecasting (longer than 24h), additional weather data and a larger image spatial scale would be  
119 beneficial. In the next release, we plan to include these extra variables and provide a low-resolution  
120 version of image-based variables with a larger spatial scale for ultra-long-term forecasting. All  
121 updates to the next release will be documented and made available on the dataset and code webpage.

### 122 A.2.6 Distribution

123 The SolarCube is an open dataset and will be distributed through Zenodo [https://doi.org/10.5281/  
124 zenodo.11498739](https://doi.org/10.5281/zenodo.11498739) with a Creative Commons Attribution 4.0 International License. Users can freely  
125 download it without restrictions. The Python package which allows users to customize the input and  
126 output time length, data format, and aggregation level to generate data for other variations of the  
127 tasks is also shared in <https://github.com/Ruohan-Li/SolarCube>.

### 128 A.2.7 Maintenance

129 The University of Maryland will support, host, and maintain the dataset. The managers of the  
130 dataset can be contacted through the following emails: Ruohan Li ([r526li@umd.edu](mailto:r526li@umd.edu)) and Yiqun  
131 Xie ([xie@umd.edu](mailto:xie@umd.edu)). There is no erratum. If errors are found in the future or additional features  
132 are added, the dataset will be updated and released as a new version on Zenodo. Corresponding  
133 announcements will be posted on the project’s GitHub page. In the meantime, older versions of the  
134 dataset will continue to be maintained and hosted. Currently, there is no mechanism for others to  
135 extend, augment, build on, or contribute to the dataset.

## 136 A.2.8 Author Statement

137 The authors of this paper bear all responsibility for any violation of rights and confirm that the data is  
138 properly licensed.

## 139 B Models: Access and Additional Details

### 140 B.1 Code Access

141 The SolarCube Python package for sampling and visualizing data, along with the benchmark model,  
142 can be accessed at <https://github.com/Ruohan-Li/SolarCube>

### 143 B.2 Additional Details

144 The configurations of the benchmark models used for different tasks are summarized in this section.  
145 For all tasks, we generate the predictions in a non-auto-regressive way.

#### 146 B.2.1 Track 1: Area-based forecasting.

147 **ConvLSTM** We adopted the default configuration of the ConvLSTM model in <https://github.com/jhhuang96/ConvLSTM-PyTorch.git>. The model is structured in an encoder-decoder architecture with leaky ReLU activations. The encoder starts with three convolutional layers, each with a kernel size of  $3 \times 3$ . Following these, three ConvLSTM cells are employed to handle the temporal dimension, each with a filter size of 5. The decoder mirrors this structure in reverse, beginning with ConvLSTM cells to manage the temporal data and then utilizing deconvolutional layers to upsample the spatial dimensions. The kernel size for the first two deconvolutional layers is  $4 \times 4$ , while the last layers use a combination of  $3 \times 3$  and  $1 \times 1$  kernels. The initial learning rate is set as 0.0001 and is dynamically reduced by half if the validation performance does not improve for 4 consecutive epochs.

156 **Space-time Transformer Models** We consider three variants of space-time transformers: (1) the axial attention model (Axial), (2) the video swin-transformer (Video-swin), and (3) the divided space-time attention model (Divided-st), which are based on EarthFormer (<https://github.com/amazon-science/earth-forecasting-transformer.git>). We use the default configuration in the EarthFormer. Earthformer employs a hierarchical encoder-decoder architecture. Each hierarchy stacks four cuboid attention blocks. Several cuboid attention layers for different cuboid attention patterns are enclosed in each block. The three variants differ from each other by the choice of the cuboid attention patterns in the encoder, which are summarized in Table 5.

- 164 (1) For Axial, there are three cuboid attention layers, each separated along a different dimension:  
165 temporal, width, and height. There is no window shift offset when separating the cuboids.
- 166 (2) For Video-Swin, two cuboid attention layers are included. Both layers have a cuboid pattern  
167 with dimensions (2, 4, 4). One layer is separated without a window shift, while the other is  
168 separated with a window shift of half the cuboid size along each dimension.
- 169 (3) Divided-ST also has two cuboid attention layers. One layer is separated along the temporal  
170 dimension, and the other along the spatial dimensions. To save memory, we use half the size  
171 of the spatial dimensions as one cuboid size.

172 When multiple cuboid attention layers are stacked, each one is paired with layer normalization and a  
173 feed-forward network. The decoder uses the "Axial" pattern for its cuboid blocks. To adjust the spatial  
174 resolution before applying the cuboid attention layers, the model integrates initial downsampling  
175 and upsampling modules. The downsampling layer consists of one 2D convolutional layer and one  
176 patch-merge layer, which halves the spatial scale and merges the spatial dimensions into channels.  
177 The upsampling modules are composed of one nearest neighbor interpolation layer. The final model  
178 is trained with an initial learning rate of 0.001, using a cosine annealing schedule, gradient clipping  
179 at 1.0, and a warmup phase over the first 20% of the 100 epochs.

Table 5: Configurations of the cuboid attention patterns of Axial, Video-swin, and Divided-st.  $T$ ,  $H$ , and  $W$  represent the time sequence length, height, and width of the input tensor. Shift represents the window shift offset when separating the cuboids [13].

| Model Name | Configurations | Values                                            |
|------------|----------------|---------------------------------------------------|
| Axial      | cuboid_size    | $(T,1,1) \rightarrow (1,H,1) \rightarrow (1,1,W)$ |
|            | shift          | $(0,0,0) \rightarrow (0,0,0) \rightarrow (0,0,0)$ |
| Video-swin | cuboid_size    | $(2,4,4) \rightarrow (2,4,4)$                     |
|            | shift          | $(0,0,0) \rightarrow (1,2,2)$                     |
| Divided-st | cuboid_size    | $(T,1,1) \rightarrow (1,H/2,W/2)$                 |
|            | shift          | $(0,0,0) \rightarrow (0,0,0)$                     |

## 180 B.2.2 Track 2: Point-based forecasting

181 **LSTM** The LSTM model is composed of two LSTM layers with 128 neurons each. These layers  
 182 are followed by a linear layer with 64 neurons and a final output layer. The model is trained with a  
 183 learning rate of 0.001.

184 **LSTM-attention** The LSTM-attention model follows an encoder-decoder architecture, where an  
 185 LSTM encoder processes the input sequence and generates a sequence of hidden states, and an LSTM  
 186 decoder takes the hidden states as the initial states and generates the output sequence. The attention  
 187 scores are computed using the Bahdanau-style (additive) attention from the encoder outputs and then  
 188 applied to the decoder outputs, followed by a linear output layer. The inputs of the encoder and  
 189 decoder are embedded with 256 neurons respectively. Both LSTM layers have 256 neurons. The  
 190 model is trained with a learning rate of 0.001.

191 **Informer** We implemented the Informer model following [https://github.com/zhouhaoyi/](https://github.com/zhouhaoyi/Informer2020.git)  
 192 [Informer2020.git](https://github.com/zhouhaoyi/Informer2020.git) with the default configuration. Informer has a ProbSparse self-attention mecha-  
 193 nism to enhance efficiency. The input data is embedded with an output dimension of 512. The model  
 194 includes 2 encoder blocks and 1 decoder block, composed of self-attention and feed-forward layers.  
 195 The feed-forward layer dimension is set to 2048. The multi-head attention mechanism is configured  
 196 with 8 heads. GELU is used as the activation function. The label length is set to match the length  
 197 of the input sequence. The learning rate follows a one-cycle schedule, increasing to a maximum of  
 198 0.0001.

199 **Transformer** The model shares the same settings as the Informer for the number of encoder layers,  
 200 decoder layers, embedding layer dimension, feed-forward layer dimension, the number of heads, the  
 201 activation function, and the learning rate. The only difference is that it uses the regular self-attention  
 202 instead of the ProbSparse self-attention in Informer.

## 203 References

- 204 [1] A. De Marco, I. Petrosillo, T. Semeraro, M. R. Pasimeni, R. Aretano, and G. Zurlini, “The  
 205 contribution of utility-scale solar energy to the global climate regulation and its effects on local  
 206 ecosystem services,” *Global ecology and conservation*, vol. 2, pp. 324–337, 2014.
- 207 [2] F. Creutzig, P. Agoston, J. C. Goldschmidt, G. Luderer, G. Nemet, and R. C. Pietzcker, “The  
 208 underestimated potential of solar energy to mitigate climate change,” *Nature Energy*, vol. 2,  
 209 no. 9, pp. 1–9, 2017.
- 210 [3] Y. Xie, E. He, X. Jia, H. Bao, X. Zhou, R. Ghosh, and P. Ravirathinam, “A statistically-guided  
 211 deep network transformation and moderation framework for data with spatial heterogeneity,” in  
 212 *2021 IEEE International Conference on Data Mining (ICDM)*. IEEE, 2021, pp. 767–776.
- 213 [4] W. Wang, S. Li, H. Hashimoto, H. Takenaka, A. Higuchi, S. Kalluri, and R. Nemani, “An  
 214 introduction to the geostationary-nasa earth exchange (geonex) products: 1. top-of-atmosphere  
 215 reflectance and brightness temperature,” *Remote Sensing*, vol. 12, no. 8, p. 1267, 2020.

- 216 [5] NOAA, “ATBD Enterprise Cloud Mask v1.2,” 2020, accessed: 2024-06-11. [Online]. Avail-  
217 able: [https://www.star.nesdis.noaa.gov/goesr/documents/ATBDs/Enterprise/ATBD\\_Enterprise\\_](https://www.star.nesdis.noaa.gov/goesr/documents/ATBDs/Enterprise/ATBD_Enterprise_Cloud_Mask_v1.2_2020_10_01.pdf)  
218 [Cloud\\_Mask\\_v1.2\\_2020\\_10\\_01.pdf](https://www.star.nesdis.noaa.gov/goesr/documents/ATBDs/Enterprise/ATBD_Enterprise_Cloud_Mask_v1.2_2020_10_01.pdf)
- 219 [6] NCI, “Nwc-cdop3-geo-mf-cms-sci-vr-cloud v2.0.1,” 2024, accessed: 2024-06-11. [On-  
220 line]. Available: [https://opus.nci.org.au/pages/viewpage.action?pageId=206110966&preview=](https://opus.nci.org.au/pages/viewpage.action?pageId=206110966&preview=/206110966/206111115/NWC-CDOP3-GEO-MF-CMS-SCI-VR-Cloud_v2.0.1.pdf)  
221 [/206110966/206111115/NWC-CDOP3-GEO-MF-CMS-SCI-VR-Cloud\\_v2.0.1.pdf](https://opus.nci.org.au/pages/viewpage.action?pageId=206110966&preview=/206110966/206111115/NWC-CDOP3-GEO-MF-CMS-SCI-VR-Cloud_v2.0.1.pdf)
- 222 [7] J. A. Augustine, J. J. DeLuisi, and C. N. Long, “Surfrad—a national surface radiation budget  
223 network for atmospheric research,” *Bulletin of the American Meteorological Society*, vol. 81,  
224 no. 10, pp. 2341–2358, 2000.
- 225 [8] A. Driemel, J. Augustine, K. Behrens, S. Colle, C. Cox, E. Cuevas-Agulló, F. M. Denn,  
226 T. Duprat, M. Fukuda, H. Grobe *et al.*, “Baseline surface radiation network (bsrn): structure and  
227 data description (1992–2017),” *Earth System Science Data*, vol. 10, no. 3, pp. 1491–1501, 2018.
- 228 [9] USGS, *MODIS/Terra+Aqua Land Cover Type (MCD12Q1) User Guide, Version 6*, 2020,  
229 accessed: 2024-06-11. [Online]. Available: [https://lpdaac.usgs.gov/documents/101/MCD12\\_](https://lpdaac.usgs.gov/documents/101/MCD12_User_Guide_V6.pdf)  
230 [User\\_Guide\\_V6.pdf](https://lpdaac.usgs.gov/documents/101/MCD12_User_Guide_V6.pdf)
- 231 [10] E. R. Observation and U. Science (EROS) Center, “Global 30 arc-second elevation (gtopo30),”  
232 2017.
- 233 [11] D. Wang, “MODIS/Terra+Aqua Downward Shortwave Radiation Daily/3-Hour L3 Global  
234 0.05Deg CMG V062 [Data set],” 2024, accessed 2024-05-26. [Online]. Available:  
235 <https://doi.org/10.5067/MODIS/MCD18C1.062>
- 236 [12] R. Li, D. Wang, W. Wang, and R. Nemani, “A geonex-based high-spatiotemporal-resolution  
237 product of land surface downward shortwave radiation and photosynthetically active radiation,”  
238 *Earth System Science Data*, vol. 15, no. 3, pp. 1419–1436, 2023.
- 239 [13] Z. Liu, Y. Lin, Y. Cao, H. Hu, Y. Wei, Z. Zhang, S. Lin, and B. Guo, “Swin transformer:  
240 Hierarchical vision transformer using shifted windows,” in *Proceedings of the IEEE/CVF*  
241 *international conference on computer vision*, 2021, pp. 10 012–10 022.
